# Supplementary material
Source: publisher site journal article supplement (https://www.dovepress.com/article/229768)
Supplement: Supplementary file 1 [file get_supplementary_file.php]

Supplementary figure and legend

**Figure S1** Differences of (a) overall survival (OS), (b) disease-free survival (DFS), (c) relapse rate (RR) and (d) no relapse mortality (NRM) between the Dec group and the non-Dec group of all 76 patients.





**Abbreviations:** HSCT, hematopoietic stem cell transplantation; IPSS, international prognostic scoring system
